# Supplementary material
Source: HighWire-hosted journal article supplement (https://bmjopenquality.bmj.com/highwire/filestream/136167/field_highwire_adjunct_files/1/ds3898.docx)
Supplement: ds3898.docx [file ds3898.docx]

Improvements to surgery, best practice tariff and mortality

**Graph 1 - Graph demonstrating the improvements in proportion of patients operated on within 36 hours**

**Graph 2 - Graph demonstrating the improvements in the attainment of the Best Practice Tariff from 2010 - 2013**

**Graph 3 – Graph demonstrating reduction in mortality from 2010 to 2013**
